# Supplementary material for: A field-based thickness measurement dataset of fallout pyroclastic deposits in the peri-volcanic areas of Campania (Italy): statistical combination of different predictions for spatial estimation of thickness
Source: Copernicus journal article supplement (doi:10.5194/essd-16-4161-2024), 2024-09-13
Supplement: Supplementary file 1 [file essd-16-4161-2024-supplement.pdf]

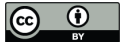

*Supplement of*

**A field-based thickness measurement dataset of fallout pyroclastic deposits in the peri-volcanic areas of Campania (Italy): statistical combination of different predictions for spatial estimation of thickness**

**Pooria Ebrahimi et al.**

*Correspondence to:* Fabio Matano ([fabio.matano@cnr.it](mailto:fabio.matano@cnr.it))

The copyright of individual parts of the supplement might differ from the article licence.

Additional tables and figure:

**Table S1** The eruptions of Somma-Vesuvius used for elaborating isopach maps.

5 **Table S2** The eruptions of Phlegrean Fields considered for elaborating isopach maps.

**Figure S1** (a) Variation of the out of bag error against number of trees; (b) Variable importance based on the impurity; and (c) variable importance based on permutation.

10

**Table S1** The eruptions of Somma-Vesuvius used for elaborating isopach maps.

| <b>Eruption</b>          | <b>Age</b>                                                                 | <b>Reference</b>                                                                                         |
|--------------------------|----------------------------------------------------------------------------|----------------------------------------------------------------------------------------------------------|
| 1944                     | 1944 CE                                                                    | Cole and Scarpati (2010); Cubellis et al. (2016)                                                         |
| 1906                     | 1906 CE                                                                    | Arrighi et al. (2001); Cerbai and Principe (1996)                                                        |
| 1822                     | 1822 CE                                                                    |                                                                                                          |
| 1730                     | 1730 CE                                                                    |                                                                                                          |
| 1723                     | 1723 CE                                                                    |                                                                                                          |
| 1707                     | 1707 CE                                                                    |                                                                                                          |
| 1682                     | 1682 CE                                                                    |                                                                                                          |
| 1631                     | 1631 CE                                                                    |                                                                                                          |
| Third medieval eruption  | 1140±60 yr BP                                                              | Rolandi et al. (1998)                                                                                    |
| Second medieval eruption | 1290±40 to 1440±60 yr BP                                                   |                                                                                                          |
| First medieval eruption  |                                                                            |                                                                                                          |
| Pollena                  | 472 CE                                                                     | Rolandi et al. (2004); Sulpizio et al. (2007, 2005); Rosi and Santacroce (1983); Delibrias et al. (1979) |
| Pompeii                  | 79 CE                                                                      | Sigurdsson et al. (1985); Luongo et al. (2003a,b); Zanella et al. (2007)                                 |
| AP6                      | 203 BCE                                                                    | Andronico and Cioni (2002); Rolandi et al. (1998); Somma et al. (2001)                                   |
| AP5                      |                                                                            |                                                                                                          |
| AP4                      |                                                                            |                                                                                                          |
| AP3                      | 2710±60 yr BP                                                              |                                                                                                          |
| AP2                      | 3000±200 yr BP<br>3225 to 1140 yr BP                                       |                                                                                                          |
| AP1                      | 3220±65 yr BP<br>3420±100 yr BP                                            |                                                                                                          |
| Avellino                 | 3.9 ka BP                                                                  |                                                                                                          |
| Mercato                  | 9 ka BP                                                                    | Rolandi et al. (1993b); Aulinas et al. (2008)                                                            |
| Pomici Verdoline         | 19 ka BP                                                                   | Cioni et al. (2003); Arnò et al. (1987)                                                                  |
| Pomici di Base           | 22 ka BP                                                                   | Bertagnini et al. (1998); Andronico et al. (1995); Arnò et al. (1987)                                    |
| Codola                   | 25.10±0.40 ka BP<br>30.02±0.42 cal ka BP<br>33 ka BP inferred calendar age | Di Vito et al. (2008)                                                                                    |
| Taurano                  | 33 to 36 cal ka BP                                                         | Di Vito et al. (2008)                                                                                    |

15 **Table S2** The eruptions of Phlegrean Fields considered for elaborating isopach maps.

| <b>Eruption</b>          | <b>Age</b>                             | <b>Reference</b>                                                      |
|--------------------------|----------------------------------------|-----------------------------------------------------------------------|
| Averno 2                 | 3.8 ka BP                              | Costa et al. (2009)                                                   |
| Astroni                  | 3.8 ka BP                              | Costa et al. (2009); Di Vito et al. (2021)                            |
| Agnano Monte Spina       | 4.4 ka BP                              | De Vita et al. (1999); Costa et al. (2009)                            |
| PaleoAstroni 2           | 4.7 ka BP                              | Di Vito et al. (2021)                                                 |
| Agnano 3                 | 5.2 ka BP                              |                                                                       |
| Agnano Pomici Principali | 12.5 ka BP                             | Orsi et al. (2004); Di Vito et al. (1999)                             |
| Neapolitan Yellow Tuff   | 15 ka BP                               | Scarpati et al. (1993)                                                |
| TAU1-e                   | 22 to 23 cal ka BP                     | Di Vito et al. (2008)                                                 |
| Masseria del Monte       | 29 ka BP                               | Albert et al. (2019)                                                  |
| SMP1-d                   | 33 to 36 cal ka BP                     | Di Vito et al. (2008)                                                 |
| Campanian Ignimbrite     | 39 ka BP                               | Costa et al. (2012); Giaccio et al. (2008); Cappelletti et al. (2003) |
| Santa Lucia              | 47.5±2.6 cal ka BP<br>50.95±2.98 ka BP | Di Vito et al. (2008)                                                 |
| CA1-a                    | 55 to 105 ka BP                        | Di Vito et al. (2008)                                                 |

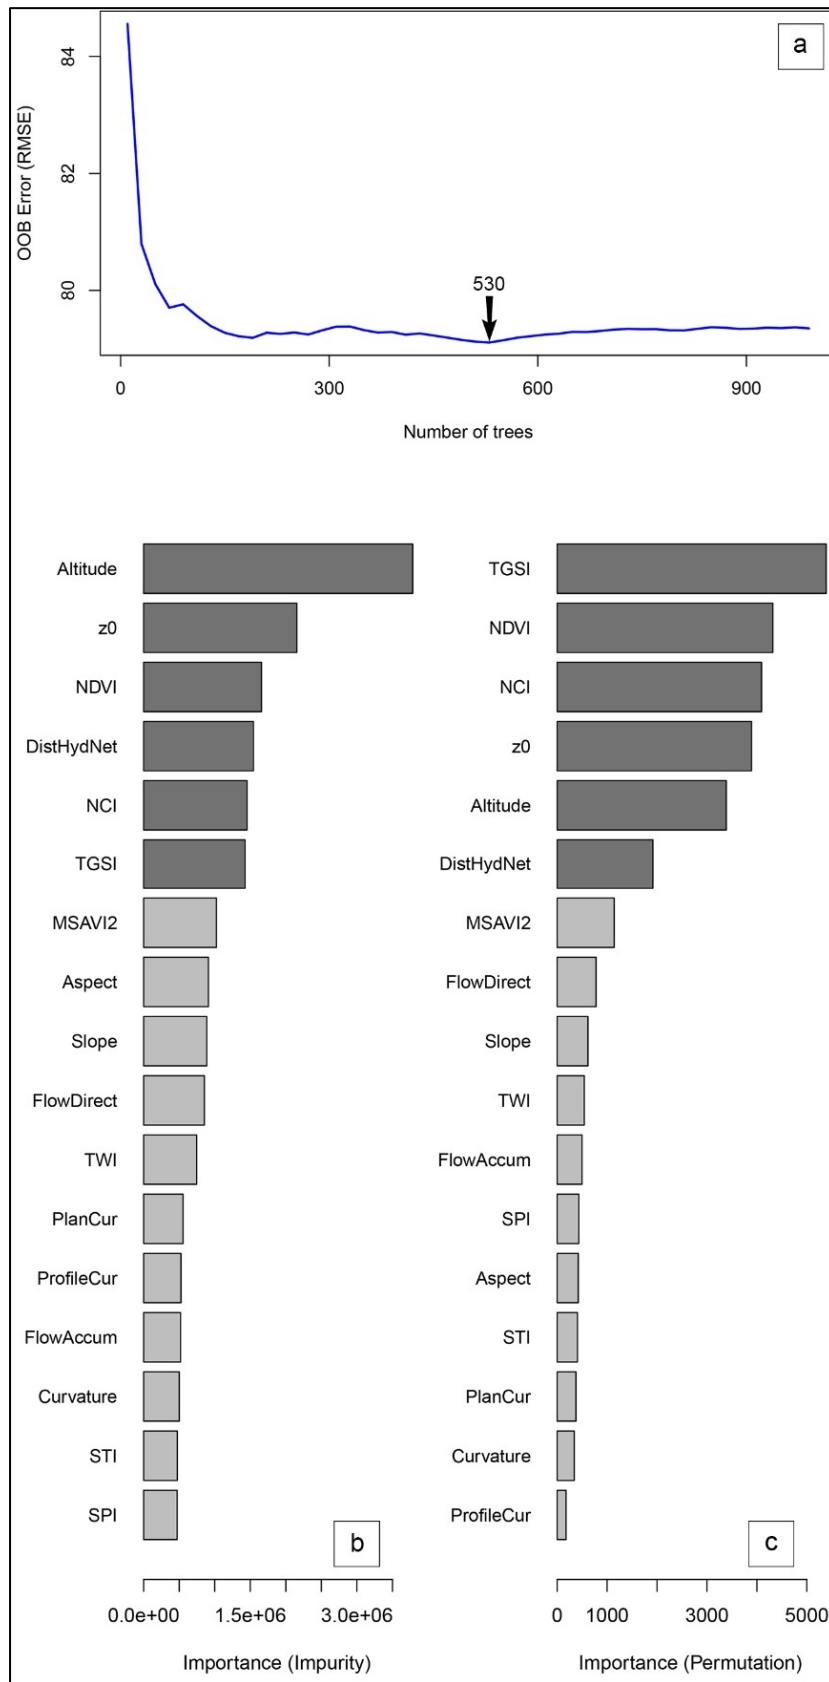

20 **Fig. S1** (a) Variation of the out of bag error against number of trees; (b) Variable importance based on the impurity; and (c) variable importance based on permutation.

## References

- 25 Albert, P. G., Giaccio, B., Isaia, R., Costa, A., Niespolo, E. M., Nomade, S., Pereira, A., Renne, P. R., Hinchliffe, A., Mark, D. F., Brown, R. J., & Smith, V. C.: Evidence for a large-magnitude eruption from Campi Flegrei caldera (Italy) at 29 ka. *Geology*, 47(7), 595-599. <https://doi.org/10.1130/G45805.1>, 2019.
- Andronico, D., Calderoni, G., Cioni, R., Sbrana, A., Sulpizio, R., & Santacroce, R.: Geological map of Somma-Vesuvius volcano. *Period. Mineral.*, 64 (1-2), 77-78, 1995.
- 30 Andronico, D., & Cioni, R.: Contrasting styles of Mount Vesuvius activity in the period between the Avellino and Pompeii Plinian eruptions, and some implications for assessment of future hazards. *B. Volcanol.*, 64, 372-391. <https://doi.org/10.1007/s00445-002-0215-4>, 2002.
- Arnò, V., Principe, C., Rosi, M., Santacroce, R., Sbrana, A., & Sheridan, M. F.: Eruptive history. In: Santacroce, R. (Ed.). *Somma-Vesuvius. Quaderni de 'La Ricerca Scientifica' CNR*, 114(8): 53-103, 1987.
- 35 Arrighi, S., Principe, C., & Rosi, M.: Violent strombolian and subplinian eruptions at Vesuvius during post-1631 activity. *B. Volcanol.*, 63, 126-150. <https://doi.org/10.1007/s004450100130>, 2001.
- Aulinas, M., Civetta, L., Di Vito, M. A., Orsi, G., Gimeno, D., & Fernández-Turiel, J. L.: The "Pomici di mercato" Plinian eruption of Somma-Vesuvius: magma chamber processes and eruption dynamics. *B. Volcanol.*, 70, 825-840. <https://doi.org/10.1007/s00445-007-0172-z>, 2008.
- 40 Bertagnini, A., Cioni, R., Guidoboni, E., Rosi, M., Neri, A., & Boschi, E.: Eruption early warning at Vesuvius: The AD 1631 lesson. *Geophys. Res. Lett.*, 33(18). <https://doi.org/10.1029/2006GL027297>, 2006.
- Bertagnini, A., Landi, P., Rosi, M., & Vigliarigo, A.: The Pomici di Base plinian eruption of Somma-Vesuvius. *J. Volcanol. Geoth. Res.*, 83(3-4), 219-239. [https://doi.org/10.1016/S0377-0273\(98\)00025-0](https://doi.org/10.1016/S0377-0273(98)00025-0), 1998.
- Cappelletti, P., Cerri, G., Colella, A., de'Gennaro, M., Langella, A., Perrotta, A., & Scarpati, C.: Post-eruptive processes in the Campanian Ignimbrite. *Mineral. Petrol.*, 79, 79-97. <https://doi.org/10.1007/s00710-003-0003-7>, 2003.
- 45 Cerbai, I., & Principe, C.: Bibliography of Historic Activity on Italian Volcanoes. Institute of Geochronology and Isotope Geology. Italian National Research Council (IGGI). Internal report n.° 6/96, 1996.
- Cioni, R., Sulpizio, R., & Garruccio, N.: Variability of the eruption dynamics during a subplinian event: The Greenish Pumice eruption of Somma-Vesuvius (Italy). *J. Volcanol. Geoth. Res.*, 124, 89-114. [https://doi.org/10.1016/S0377-0273\(03\)00070-2](https://doi.org/10.1016/S0377-0273(03)00070-2), 2003.
- 50 Cole, P., & Scarpati, C.: The 1944 eruption of Vesuvius, Italy: Combining contemporary accounts and field studies for a new volcanological reconstruction. *Geol. Mag.*, 147 (3), 391-415. <https://doi.org/10.1017/S0016756809990495>, 2010.
- Costa, A., Dell'Erba, F., Di Vito, M. A., Isaia, R., Macedonio, G., Orsi, G., & Pfeiffer, T.: Tephra fallout hazard assessment at the Campi Flegrei caldera (Italy). *B. Volcanol.*, 71, 259-273. <https://doi.org/10.1007/s00445-008-0220-3>, 2009.
- 55 Costa, A., Folch, A., Macedonio, G., Giaccio, B., Isaia, R., & Smith, V. C.: Quantifying volcanic ash dispersal and impact of the Campanian Ignimbrite super-eruption. *Geophys. Res. Lett.*, 39(10). <https://doi.org/10.1029/2012GL051605>, 2012.
- 60 Cubellis, E., Marturano, A. & Pappalardo, L.: The last Vesuvius eruption in March 1944: reconstruction of the eruptive dynamic and its impact on the environment and people through witness reports and volcanological evidence. *Nat. Hazards*, 82, 95-121. <https://doi.org/10.1007/s11069-016-2182-7>, 2016.
- De Vita, S., Orsi, G., Civetta, L., Carandente, A., D'Antonio, M., Deino, A., Di Cesare, T., Di Vito, M. A., Fisher, R. V., Isaia, R. and Marotta, E., Necco, A., Ort, M., Pappalardo, L., Piochi, M., & Southon, J.: The Agnano-Monte Spina eruption (4100 years BP) in the restless Campi Flegrei caldera (Italy). *J. Volcanol. Geoth. Res.*, 91(2-4), 269-301. [https://doi.org/10.1016/S0377-0273\(99\)00039-6](https://doi.org/10.1016/S0377-0273(99)00039-6), 1999.
- 65 Delibrias, G., Di Paola, G. M., Rosi, M., & Santacroce, R.: La storia eruttiva del complesso vulcanico Somma Vesuvio ricostruita dalle successioni piroclastiche del Monte Somma. *Rendiconti della Società Italiana di Mineralogia e Petrologia*, 35: 411-438, 1979.

- 70 Di Vito, M. A., Aurino, P., Boenzi, G., Laforgia, E., & Rucco, I.: Human communities living in the central Campania Plain during eruptions of Vesuvius and Campi Flegrei. *Ann. Geophys.-Italy*, 64(5), VO546. <https://doi.org/10.4401/ag-8708>, 2021.
- Di Vito, M. A., Isaia, R., Orsi, G., Southon, J. D., De Vita, S., D'Antonio, M., Pappalardo, L., & Piochi, M.: Volcanism and deformation since 12,000 years at the Campi Flegrei caldera (Italy). *J. Volcanol. Geoth. Res.*, 91(2-4), 221-246. [https://doi.org/10.1016/S0377-0273\(99\)00037-2](https://doi.org/10.1016/S0377-0273(99)00037-2), 1999.
- 75 Di Vito, M. A., Sulpizio, R., Zanchetta, G., & D'Orazio, M.: The late Pleistocene pyroclastic deposits of the Campanian Plain: new insights into the explosive activity of Neapolitan volcanoes. *J. Volcanol. Geoth. Res.*, 177(1), 19-48. <https://doi.org/10.1016/j.jvolgeores.2007.11.019>, 2008.
- Di Vito, M.A., Zanella, E., Gurioli, L., Lanza, R., Sulpizio, R., Bishop, J., Tema, E., Boenzi, G., Laforgia, E.: The Afragola settlement near Vesuvius, Italy: the destruction and abandonment of a Bronze Age village revealed by archaeology, volcanology and rock-magnetism. *Earth Planet. Sc. Lett.*, 277, 408-421. <https://doi.org/10.1016/j.epsl.2008.11.006>, 2009.
- 80 Giaccio, B., Isaia, R., Fedele, F. G., Di Canzio, E., Hoffecker, J., Ronchitelli, A., Sinitsyn, A. A., Anikovich, M., Lisitsyn, S. N., & Popov, V. V.: The Campanian Ignimbrite and Codola tephra layers: two temporal/stratigraphic markers for the Early Upper Palaeolithic in southern Italy and eastern Europe. *J. Volcanol. Geoth. Res.*, 177(1), 208-226. <https://doi.org/10.1016/j.jvolgeores.2007.10.007>, 2008.
- 85 Luongo, G., Perrotta, A., & Scarpati, C.: Impact of the AD 79 explosive eruption on Pompeii, I. Relations amongst the depositional mechanisms of the pyroclastic products, the framework of the buildings and the associated destructive events. *J. Volcanol. Geoth. Res.*, 126(3-4), 201-223. [https://doi.org/10.1016/S0377-0273\(03\)00146-X](https://doi.org/10.1016/S0377-0273(03)00146-X), 2003a.
- 90 Luongo, G., Perrotta, A., Scarpati, C., De Carolis, E., Patricelli, G., & Ciarallo, A.: Impact of the AD 79 explosive eruption on Pompeii, II. Causes of death of the inhabitants inferred by stratigraphic analysis and areal distribution of the human casualties. *J. Volcanol. Geoth. Res.*, 126(3-4), 169-200. [https://doi.org/10.1016/S0377-0273\(03\)00147-1](https://doi.org/10.1016/S0377-0273(03)00147-1), 2003b.
- 95 Orsi, G., Di Vito, M. A., & Isaia, R.: Volcanic hazard assessment at the restless Campi Flegrei caldera. *B. Volcanol.*, 66, 514-530. <https://doi.org/10.1007/s00445-003-0336-4>, 2004.
- Rolandi, G., Maraffi, S., Petrosino, P., & Lirer, L.: The Ottaviano eruption of Somma-Vesuvio (8000 y BP): a magmatic alternating fall and flow-forming eruption. *J. Volcanol. Geoth. Res.*, 58(1-4), 43-65. [https://doi.org/10.1016/0377-0273\(93\)90101-V](https://doi.org/10.1016/0377-0273(93)90101-V), 1993a.
- 100 Rolandi, G., Mastrolorenzo, G., Barrella, A. M., & Borrelli, A.: The Avellino plinian eruption of Somma-Vesuvius (3760 y.B.P.): the progressive evolution from magmatic to hydromagmatic style. *J. Volcanol. Geoth. Res.*, 58(1-4), 67-88. [https://doi.org/10.1016/0377-0273\(93\)90102-W](https://doi.org/10.1016/0377-0273(93)90102-W), 1993b.
- Rolandi, G., Munno, R., & Postiglione, I.: The AD 472 eruption of the Somma volcano. *J. Volcanol. Geoth. Res.*, 129(4), 291-319. [https://doi.org/10.1016/S0377-0273\(03\)00279-8](https://doi.org/10.1016/S0377-0273(03)00279-8), 2004.
- 105 Rolandi, G., Petrosino, P., & Mc Geehin, J.: The interplinian activity at Somma-Vesuvius in the last 3500 years. *J. Volcanol. Geoth. Res.*, 82(1-4), 19-52. [https://doi.org/10.1016/S0377-0273\(97\)00056-5](https://doi.org/10.1016/S0377-0273(97)00056-5), 1998.
- Rosi, M., Principe, C., & Vecci, R. (1993). The 1631 Vesuvius eruption. A reconstruction based on historical and stratigraphical data. *J. Volcanol. Geoth. Res.*, 58(1-4), 151-182. [https://doi.org/10.1016/0377-0273\(93\)90106-2](https://doi.org/10.1016/0377-0273(93)90106-2), 1993.
- 110 Rosi, M., & Santacrose, R.: The AD 472 "Pollena" eruption: volcanological and petrological data for this poorly-known, Plinian-type event at Vesuvius. *J. Volcanol. Geoth. Res.*, 17(1-4), 249-271. [https://doi.org/10.1016/0377-0273\(83\)90071-9](https://doi.org/10.1016/0377-0273(83)90071-9), 1983.
- Scarpati, C., Cole, P., & Perrotta, A.: The Neapolitan Yellow Tuff—a large volume multiphase eruption from Campi Flegrei, southern Italy. *B. Volcanol.*, 55, 343-356. <https://doi.org/10.1007/BF00301145>, 1993.
- 115 Sevink, J., van Bergen, M. J., van der Plicht, J., Feiken, H., Anastasia, C., & Huizinga, A.: Robust date for the Bronze age Avellino eruption (Somma-Vesuvius): 3945±10 calBP (1995±10 calBC). *Quaternary Sci. Rev.*, 30(9-10), 1035-1046. <https://doi.org/10.1016/j.quascirev.2011.02.001>, 2011.

- Sigurdsson, H., Carey, S., Cornell, W., & Pescatore, T.: The eruption of Vesuvius in A.D. 79, *Natl. Geogr. Res.*, 1(3), 332-397, <https://digitalcommons.uri.edu/gsofacpubs/1114>, 1985.
- 120 Somma, R., Ayuso, R. A., De Vivo, B., & Rolandi, G.: Major, trace element and isotope geochemistry (Sr-Nd-Pb) of interplinian magmas from Mt. Somma-Vesuvius (Southern Italy). *Miner. Petrol.*, 73, 121-143. <https://doi.org/10.1007/s007100170014>, 2001.
- Sulpizio, R., Bonasia, R., Dellino, P., Mele, D., Di Vito, M. A., & La Volpe, L.: The Pomici di Avellino eruption of Somma-Vesuvius (3.9 ka BP). Part II: sedimentology and physical volcanology of pyroclastic density current deposits. *B. Volcanol.*, 72, 559-577. <https://doi.org/10.1007/s00445-009-0340-4>, 2010a.
- 125 Sulpizio, R., Cioni, R., Di Vito, M. A., Mele, D., Bonasia, R., & Dellino, P.: The Pomici di Avellino eruption of Somma-Vesuvius (3.9 ka BP). Part I: stratigraphy, compositional variability and eruptive dynamics. *B. Volcanol.*, 72, 539-558. <https://doi.org/10.1007/s00445-009-0339-x>, 2010b.
- Sulpizio, R., Mele, D., Dellino, P., & La Volpe, L.: A complex, Subplinian-type eruption from low-viscosity, phonolitic to tephri-phonolitic magma: the AD 472 (Pollena) eruption of Somma-Vesuvius, Italy. *B. Volcanol.*, 67, 743-767. <https://doi.org/10.1007/s00445-005-0414-x>, 2005.
- 130 Sulpizio, R., Mele, D., Dellino, P., & La Volpe, L.: Deposits and physical properties of pyroclastic density currents during complex Subplinian eruptions: the AD 472 (Pollena) eruption of Somma-Vesuvius, Italy. *Sedimentology*, 54(3), 607-635. <https://doi.org/10.1111/j.1365-3091.2006.00852.x>, 2007.
- 135 Zanella, E., Gurioli, L., Pareschi, M.T., & Lanza R.: Influences of urban fabric on pyroclastic density currents at Pompeii (Italy): 2. Temperature of the deposits and hazard implications. *J. Geophys. Res.*, 112, B05214. <https://doi.org/10.1029/2006JB004775>, 2007.
